# Supplementary material for: Regulating the solvation structure and adsorption behavior in zinc anodes using polar organic molecules to achieve durable dendrite-free zinc metal anodes for aqueous zinc-ion batteries
Source: Royal Society of Chemistry journal article supplement (doi:10.1039/d4tc03833a), 2024-12-24
Supplement: d4tc03833a1.pdf [file d4tc03833a1.pdf]

## Supporting Information

### **Regulating solvation structure and absorption behavior on zinc anode by polar organic molecules to achieve durable dendrite-free zinc metal anodes for aqueous zinc-ion batteries**

Xiaoqin Zhang<sup>1</sup>, Haoran Lang<sup>1</sup>, Chao Li<sup>2</sup>, Min Li<sup>1</sup>, Bin Xie<sup>1</sup>, Ji Chen<sup>1</sup>, Yuxiang Chen<sup>1</sup>, Yu Huo<sup>1</sup>, Lin Li<sup>2</sup>, Qiaoji Zheng<sup>1\*</sup>, Xin Tan<sup>2\*</sup>, Heng Zhang<sup>3\*</sup>, Dunmin Lin<sup>1\*</sup>

<sup>1</sup>College of Chemistry and Materials Science, Sichuan Normal University, Chengdu 610066, China

<sup>2</sup>Institute for Carbon Neutralization Technology, College of Chemistry and Materials Engineering, Wenzhou University, Wenzhou, Zhejiang 325035, China

<sup>3</sup>School of Materials Science and Engineering, Suzhou University of Science and Technology, Suzhou 215009, China

\*Corresponding authors: joyce@sicnu.edu.cn (Qiaoji Zheng); xintan@wzu.edu.cn (Xin Tan); [zhangheng@usts.edu.cn](mailto:zhangheng@usts.edu.cn) (Heng Zhang); ddmd222@sicnu.edu.cn (Dunmin Lin);

Fax: +86 28 84760802 Tel: +86 2884760802

## Experimental

### 1. Preparation of electrolytes

Zinc sulfate ( $\text{ZnSO}_4 \cdot 7\text{H}_2\text{O}$ , Cologne, 99%) was dissolved in deionized water (DI water) to obtain a 2 M  $\text{ZnSO}_4$  baseline electrolyte. Cyclen ( $\text{C}_8\text{H}_{20}\text{N}_4$ , Macklin, 98%) with different concentrations (5 g/L, 10 g/L, 15 g/L) was added to 2 M  $\text{ZnSO}_4$  electrolyte to obtain Cy-containing electrolytes. The optimal concentration of Cy was 10 g/L.

### 2. Preparation of electrodes

The purchased Zn foil (thickness: 20  $\mu\text{m}$ , 100  $\mu\text{m}$ , 99.99%) was polished to remove the oxidation layer, and then cut into discs ( $\phi = 10 \text{ mm}$ ) to be used as Zn electrodes.

$\text{VO}_2$  nanosheets were prepared by a hydrothermal method. 2 mmol of ammonium metavanadate was dissolved in 15 mL of DI water under magnetic stirring, and then 3 mmol of oxalic acid solution was added and stirred for 30 min. The obtained mixture was transferred to a 100 mL autoclave lined with PTFE and kept at 180 °C for 24 h. Subsequently, the synthesized powders were washed several times with ethanol and DI water and dried in a vacuum oven for one day to obtain  $\text{VO}_2$  powders. The positive electrode was prepared by mixing  $\text{VO}_2$  powders, acetylene black and polyvinylidene fluoride (PVDF) in a mass ratio of 7:2:1 with 1-Methyl-2-pyrrolidinone (NMP, Macklin, 99%) as solvent, and then the slurry was casted on a titanium foil. After drying in vacuum at 70 °C overnight, the electrode with  $\text{VO}_2$  was obtained. (Cathode loading: 1  $\text{mg}/\text{cm}^2$ )

### 3. Materials characterizations and electrochemical properties

The X-ray diffraction analysis (XRD) of samples was characterized by the XRD equipment (Smart Lab, Rigaku, Japan) with a Cu-K $\alpha$  ( $\lambda = 1.540598 \text{ \AA}$ , Smart Lab) source (scan rate of  $2 \text{ min}^{-1}$ ) and  $2\theta$  ranging from  $10^\circ$  to  $80^\circ$ . The morphology of the samples was studied by field emission scanning electron microscopy (SEM, FEI, Sirion 200). The elemental analysis of the samples was carried out using field emission scanning electron microscopy (SEM, FEI-Quanta 250, USA) with energy dispersive x-ray (EDX) elemental mapping.

All tested CR2032-type coin cells were assembled in air environment, and the amount of electrolyte used in the coin cells was  $200 \text{ }\mu\text{L}$ . The VO<sub>2</sub>//Zn full cell was assembled with the Zn foil (thickness:  $100 \text{ }\mu\text{m}$ ) as the anode and VO<sub>2</sub> as the cathode. The CV was tested in the electrolytic cell with Ti plate as the working electrode, Pt plate as the reverse electrode and Ag/AgCl as the reference electrode. With Zn plate as the working electrode, Pt plate as the reverse electrode and Ag/AgCl as the reference electrode, the LSV and Tafel diagrams were measured in the electrolytic cell. The CA is obtained by Amperometric i-t Curve testing with Zn plate as the working electrode, Pt plate as the reverse electrode, and Zn plate as the reference electrode at a voltage of  $-150 \text{ mV}$ . The electrochemical impedance spectroscopy (EIS) of the cells were conducted on the frequency range of  $100 \text{ kHz}$  to  $1 \text{ Hz}$ . The above tests were performed on an electrochemical workstation (CHI760E, CHI660E, Shanghai, China). With zinc plate as anode,  $20 \text{ }\mu\text{m}$  copper foil as cathode and glass fiber as diaphragm, a zinc-copper

half battery was assembled and CE test was carried out on the Land CT5001A battery test device.

A self-made optical Zn||Zn battery was designed for in-situ observation of zinc deposition in different electrolytes. The transparent Zn||Zn cell consists of a zinc plate and a glass dish. The zinc plate is fixed to the glass at the bottom of the glass dish, and then the electrolyte is added to the glass dish, so that the solution is immersed in the zinc plate. The transparent Zn||Zn cell was tested for Zn stripping/plating using a cell tester (LAND, China) at a current density of  $20 \text{ mA cm}^{-2}$ , in which a video camera (NSZ-808) was used to observe and record the growth of Zn dendrites.

#### 4. MD Simulations

Molecular dynamics (MD) simulations were run using LAMMPS[1, 2]. The initial configuration of the system was established using PACKMOL[3]and Moltemplate (<http://www.moltemplate.org/>). A periodic box of dimensions  $30 \times 30 \times 30 \text{ \AA}^3$  was used for the system. For the 2 M ZnSO<sub>4</sub>-Cyclen, a blank group has 40 ZnSO<sub>4</sub> molecules, and 1200 H<sub>2</sub>O molecules. In the experimental group, based on the former, an additional 20 Cyclen molecules were added. The force field parameters for the solvent were derived from the GAFF2 force field of ACPYPE[4]while the force field for the salt was sourced from (<https://doi.org/10.1063/1.5121392>). The TIP3P model was utilized for the water force field. An  $12 \text{ \AA}$  LJ cut-off and a particle-particle-particle-mesh (PPPM) solver for long-range Coulombic interactions were also employed in our simulations. First, all the systems were first submitted to energy minimization by using the conjugate

gradient(CG)method. Then, they were heated from 10 to 298 K in 1ns, followed by 2000ps equilibration under isothermal-isobaric ensemble (NPT). Then the NVT runs were 40ns long at 298K. The visualization of the electrolyte structure was achieved through VMD[5].

5. Density functional theory (DFT) calculation for solvated structure of the hydrated  $Zn^{2+}$ .

DFT calculations were conducted in Gaussian09 program. Electrostatic potential (ESP) was obtained from the Multiwfn3.8[6, 7]and VMD1.9.3[5]software packages, and the electrostatic potential involved in the analyses was evaluated by Multiwfn based on the highly effective algorithm proposed in Ref[7]. The geometries of Cyclen,  $SO_4^{2-}$ , and  $H_2O$  were optimized under the framework of DFT with B3LYP-D3(BJ)/def2-TZVP[8, 9] and the universal solvation model SMD[10] was used to simulate the aqueous environment. Then use the same functional and basis set to calculate the single point energy and binding energy of the optimized structure. The binding energy of the complex was calculated from the formula: “ $E(\text{Binding Energy})=E(AB)-E(A)-E(B)$ ”,where  $E(AB)$ ,  $E(A)$ , and  $E(B)$  denote the total energies of the AB complexes, bare A, and bare B, respectively.

6. DFT calculation for  $H_2O/Cy$  on the  $Zn(002)$ .

All of the spin-polarized DFT calculations were performed using the VASP program[11-13], which uses a plane-wave basis set and a projector augmented wave method (PAW) for the treatment of core electrons[12]. The Perdew, Burke, and

Ernzerhof exchange-correlation functional within a generalized gradient approximation (GGA-PBE)[14] was used in our calculations, and the van der Waals (vdW) correction proposed by Grimme (DFT-D3)[15] was employed due to its good description of long-range vdW interactions. For the expansion of wavefunctions over the plane-wave basis set, a converged cutoff was set to 450 eV. In geometry optimizations, all the structures were relaxed up to the residual atomic forces smaller than 0.02 eV/Å, and the total energy was converged to  $10^{-5}$  eV. The Brillouin zone integration was performed on the (4×4×1) Monkhorst–Pack k-point mesh[16].

#### 6. Calculation of the cumulative plating capacity

Cumulative plating capacity = current density × total Zn plating time

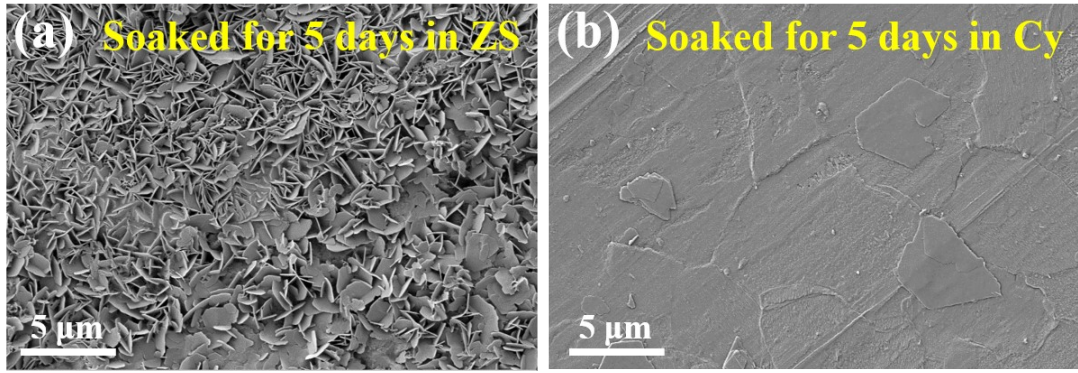

Fig. S1 SEM images of Zn soaked in (a) ZS electrolyte and (b) 10 g/L Cy-added electrolyte for 5 days.

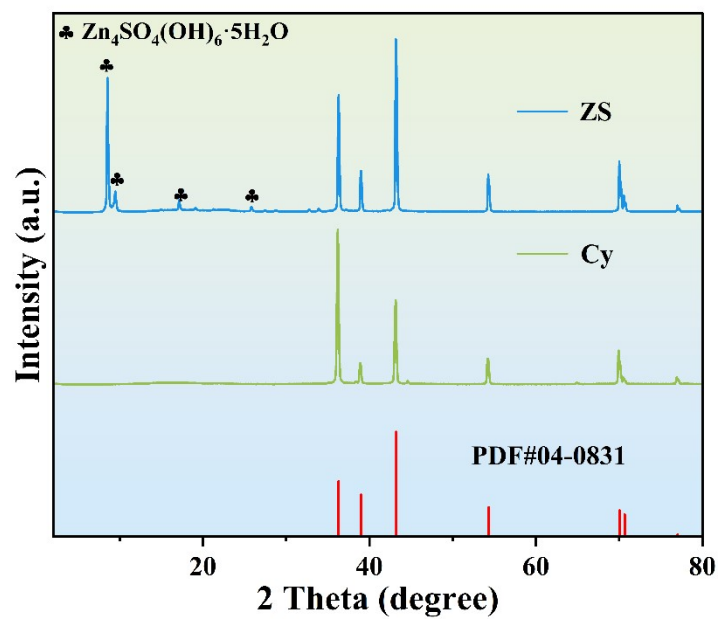

Fig. S2 XRD patterns of Zn anodes soaked for 5 days in ZS electrolytes without or with 10 g/L Cy.



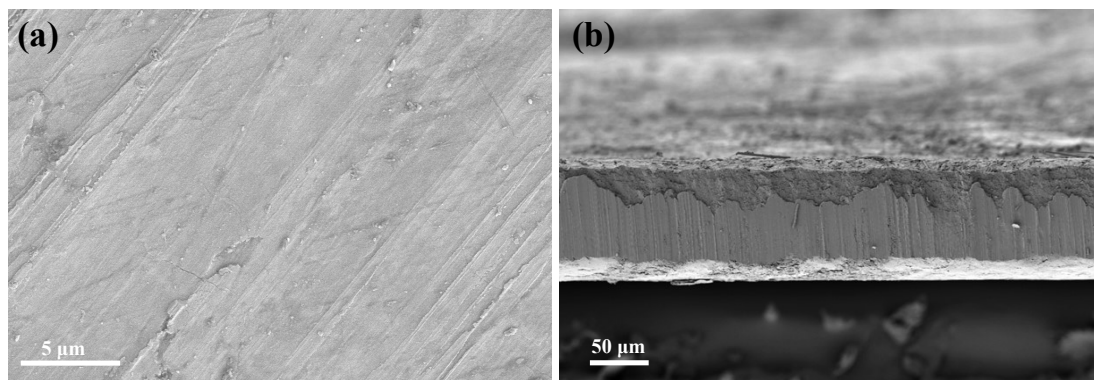

Fig. S3 SEM images of bare zinc foil: (a) surfaces and (b) cross sections.

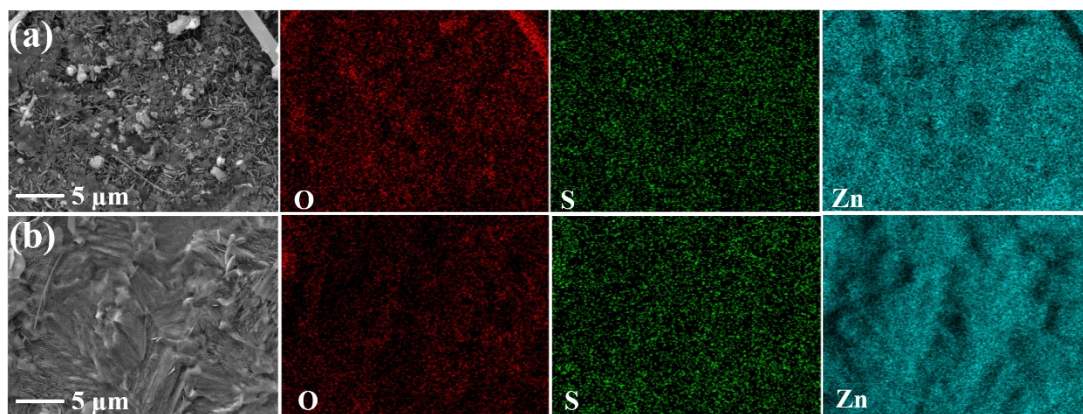

Fig. S4 SEM images and EDS mappings of surface of bare zinc foils cycled for 50 h:

(a) in ZS electrolyte; (b) in 10 g/L Cy -added ZS electrolyte.

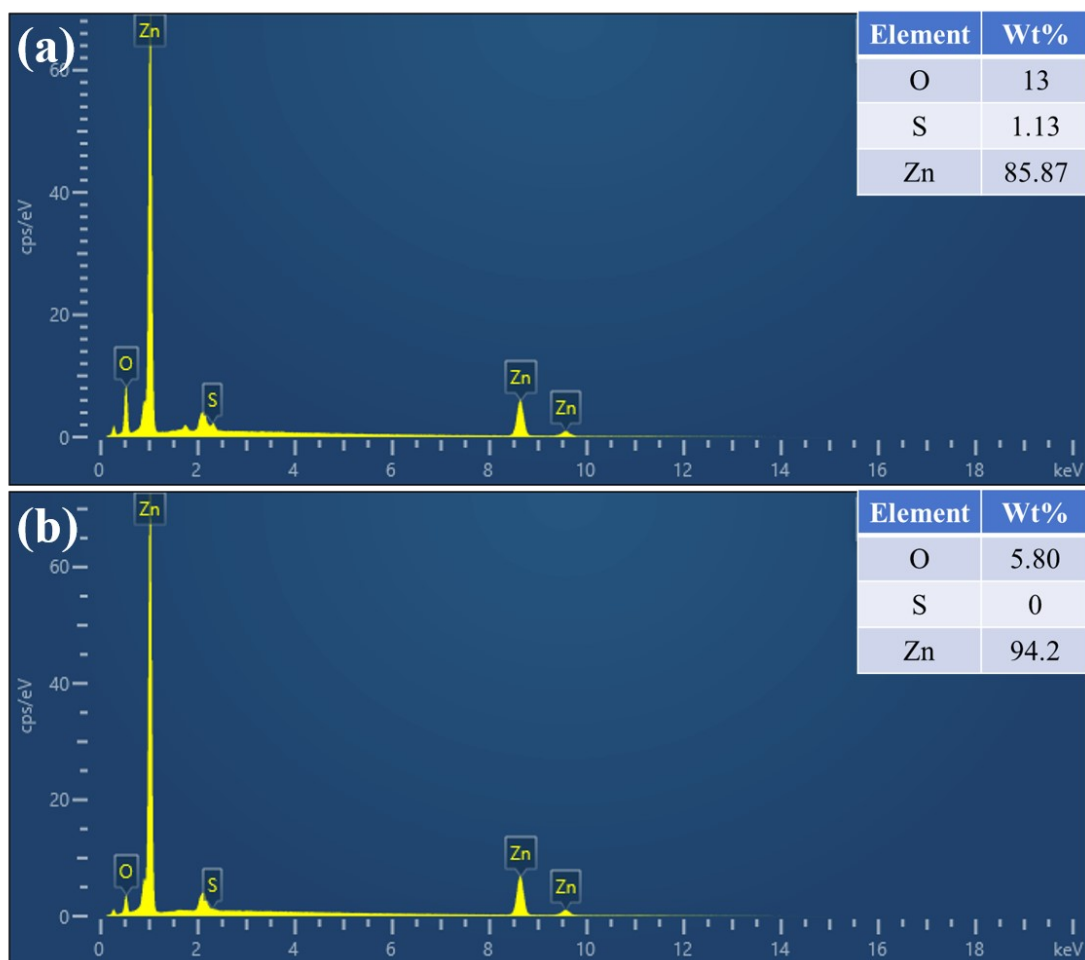

Fig. S5 EDX spectra of zinc foils cycled for 50h: (a) in ZS electrolyte; (b) in 10 g/L Cy-added ZS electrolyte.

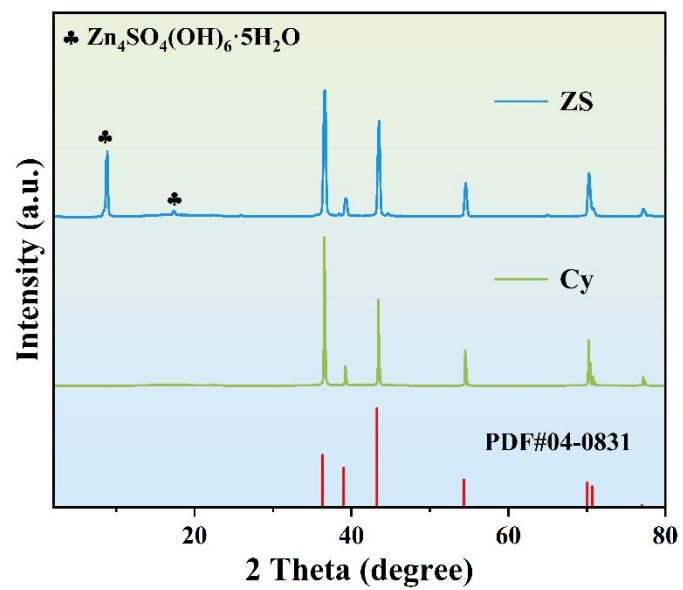

Fig. S6 XRD patterns of Zn anodes cycled for 50 h in ZS electrolytes without or with 10 g/L Cy.

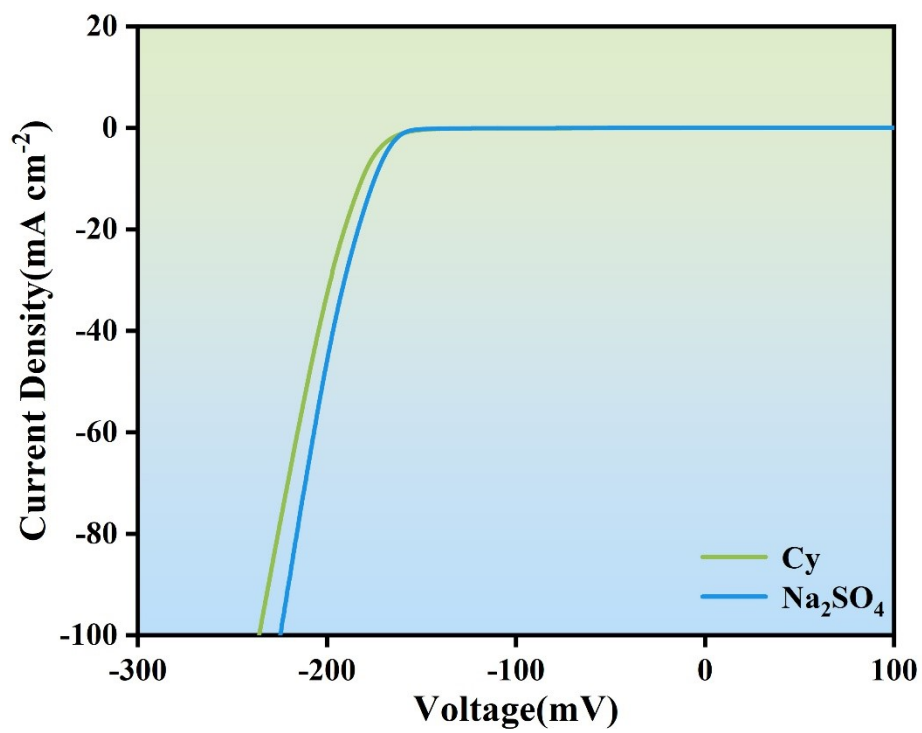

Fig. S7. Electrochemical stability windows of different electrolytes.

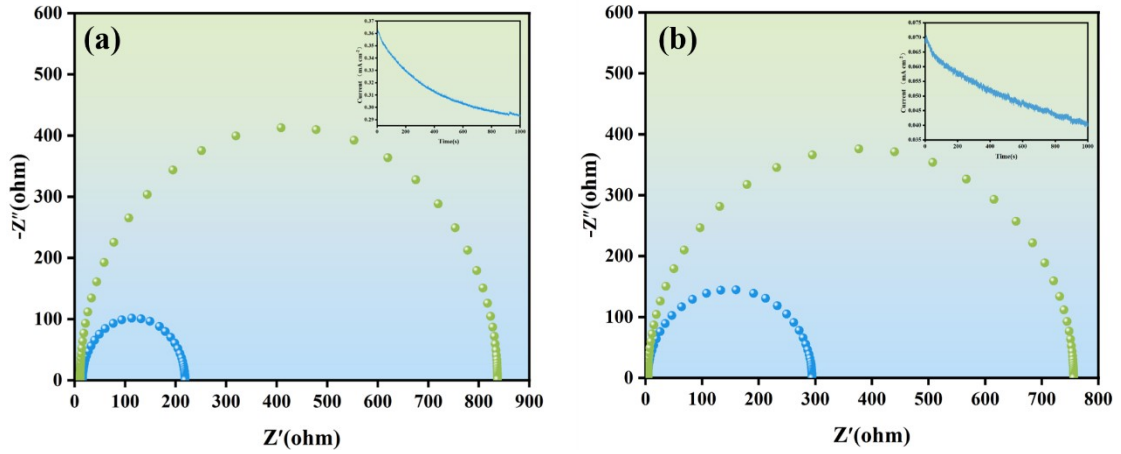

Fig. S8 Measurements of  $Zn^{2+}$  transference number. Current-time plots of Zn symmetric cells in (a) ZS and (b) 10g Cy electrolytes after polarization at a constant potential (25 mV) for 1000 s.

The transference number of  $Zn^{2+}$  ( $t$ ) can be evaluated by the following equation:

$$t_{Zn^{2+}} = \frac{I_S(\Delta V - I_0 R_0)}{I_0(\Delta V - I_S R_S)}$$

where  $\Delta V$  is the constant polarization voltage applied (25 mV here),  $I_0$  and  $R_0$  are the initial current and resistance,  $I_S$  and  $R_S$  represent the steady-state current and resistance, respectively.

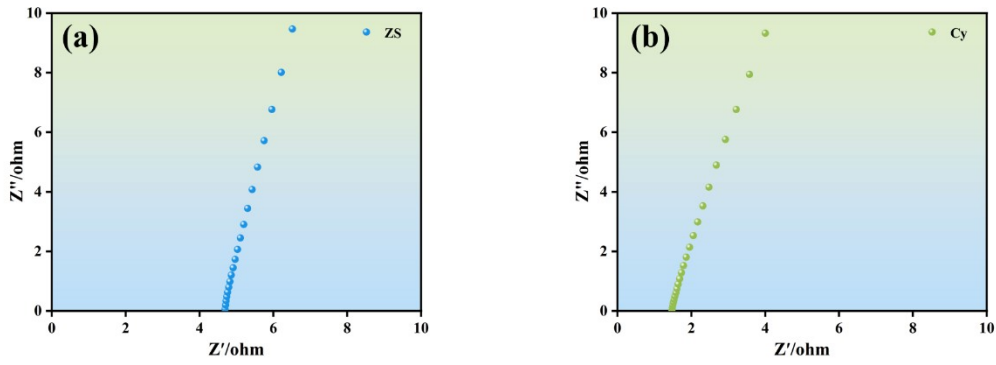

Fig. S9 EIS spectra in (a) ZS and (b) 10g Cy electrolytes.

Galvanostatic tests were performed on assembled cells using a Land CHI760E battery test system. Ionic conductivity was measured by AC impedance spectroscopy in the frequency range of 1 Hz to 100 kHz. The electrochemical cell configuration consisted of the two electrolytes to form a structure of “Ti | electrolyte | Ti.” Ionic conductivity  $\sigma$  was calculated according to the following equation:

$$\sigma = \frac{L}{AR_b}$$

where  $L$  is the thickness of the glass microfiber filters membrane, defining the distance between the two Ti electrodes as 0.042 cm, and  $A$  is the area of the electrode as 2.011 cm<sup>2</sup>. Resistance ( $R_b$ ) was taken at the intercept of the Nyquist plot with the real axis of the impedance spectra.

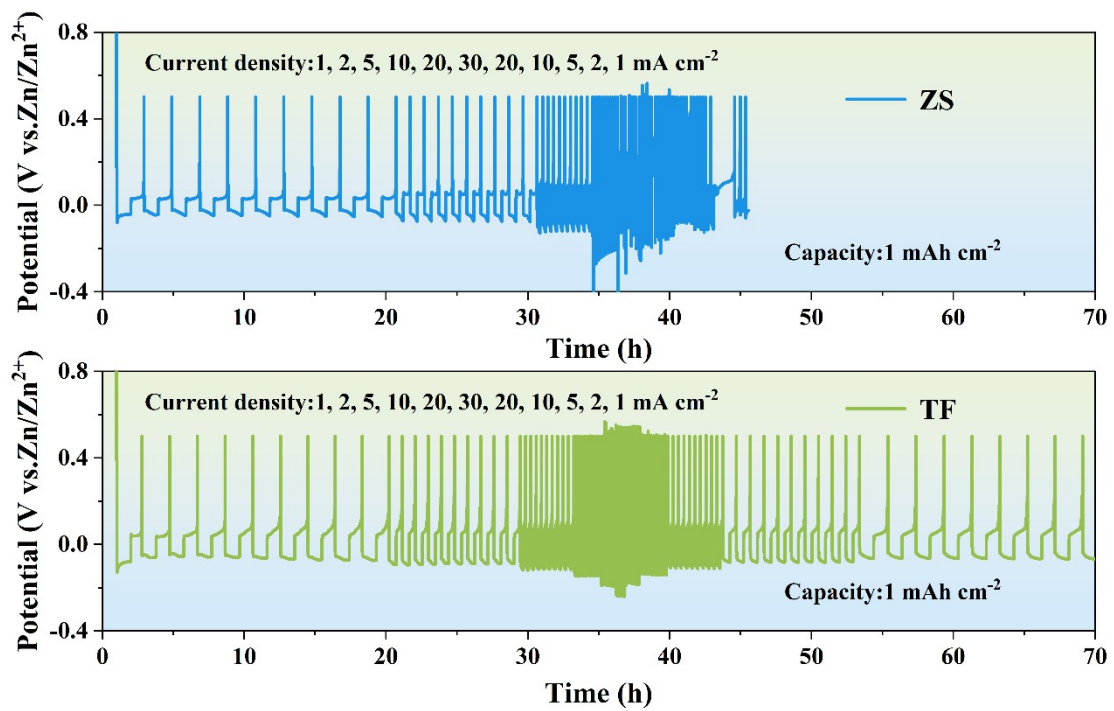

Fig. S10 Rate performance of Zn//Cu cells using (a)ZS electrolyte and (b)10 g/L Cy-added ZS electrolyte at different current densities from 1 to 30 mA cm<sup>-2</sup>.



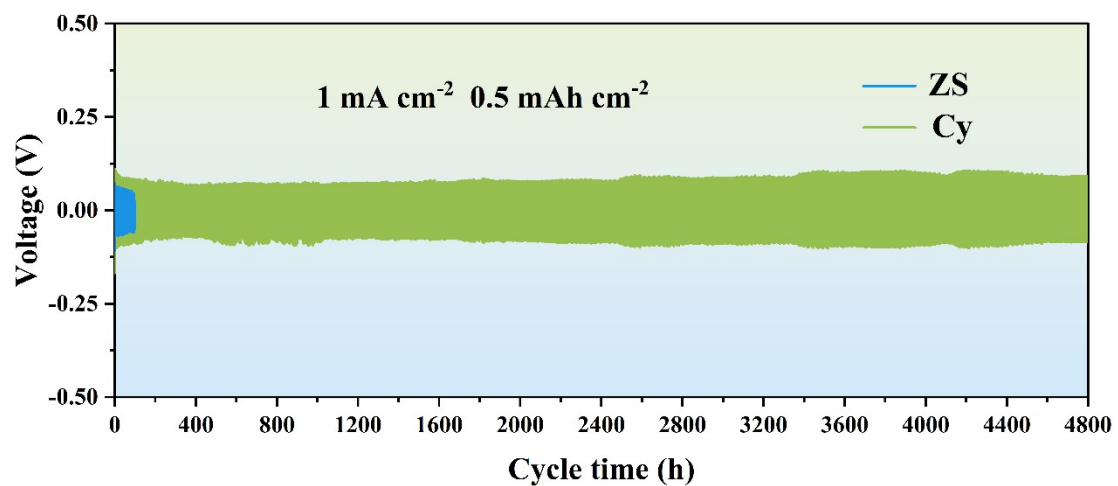

Fig. S11 Long-term cycle test of Zn||Zn symmetric batteries in different electrolytes at 1 mA cm<sup>-2</sup>/0.5 mAh cm<sup>-2</sup>.

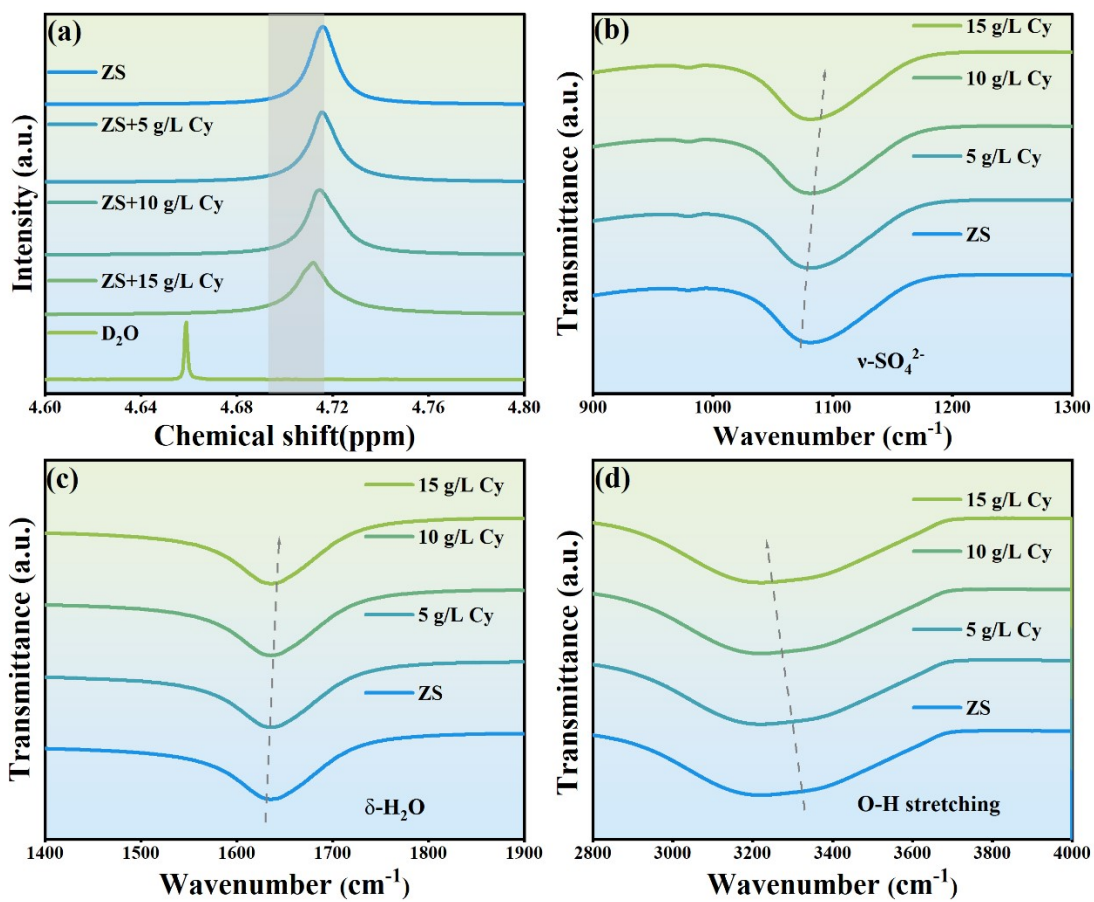

Fig. S12 (a) NMR of  $^1\text{H}$  of electrolytes with different Cy concentrations; (b-d) FT-IR spectra of ZS electrolytes with different Cy contents.

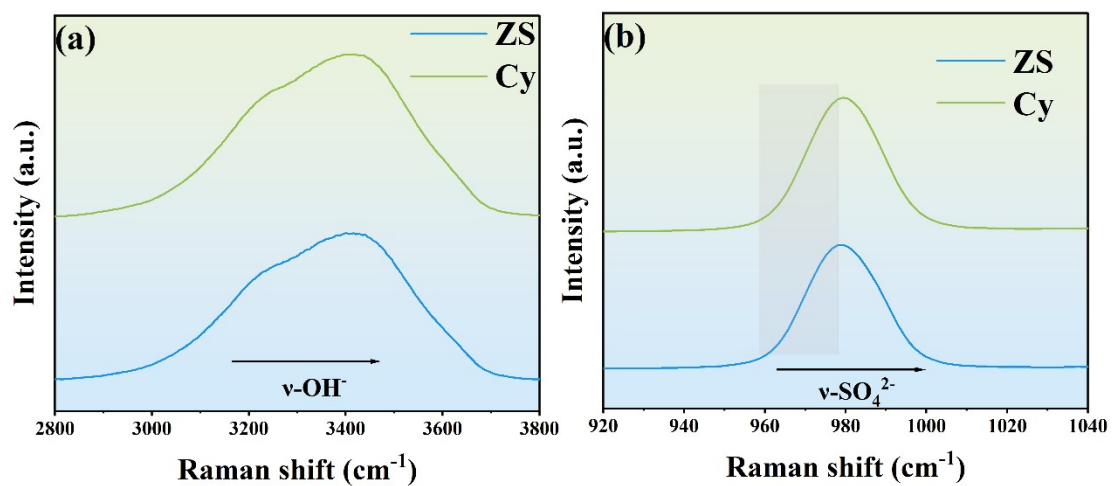

Fig. S13 (a-b) Raman spectra of ZS solution without/with 10g/L Cy.

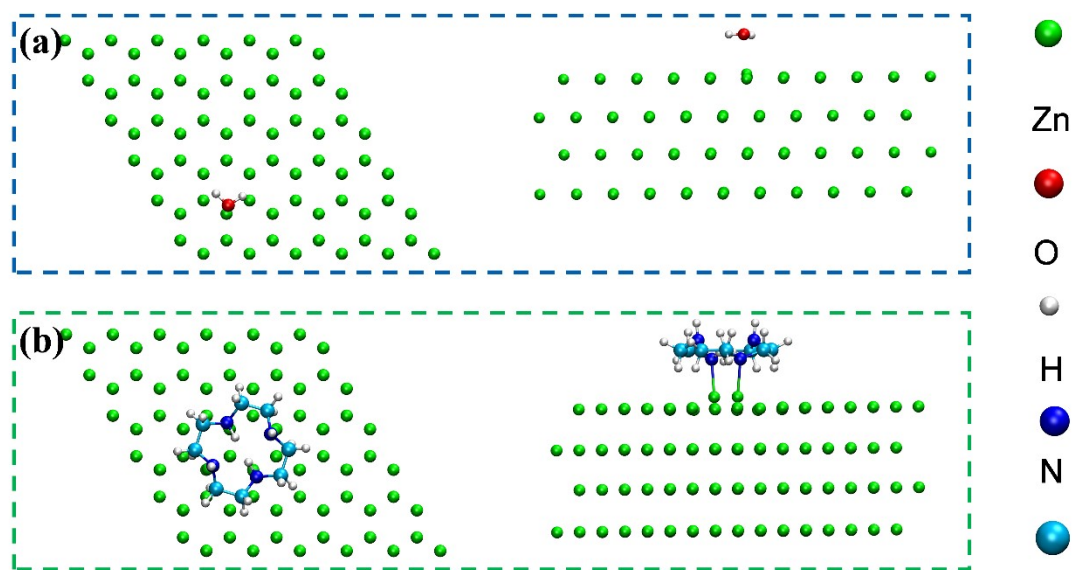

Fig. S14 Adsorption energies of H<sub>2</sub>O and Cy molecules on the Zn(002) crystal plane of Zn metal.

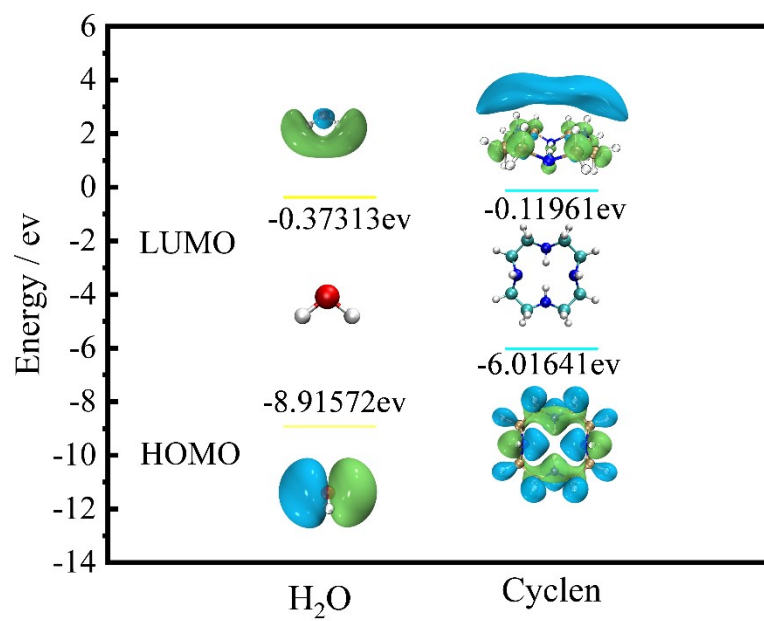

Fig. S15 LUMO, HOMO is surfaces of H<sub>2</sub>O (left) and Cy (right) molecules.

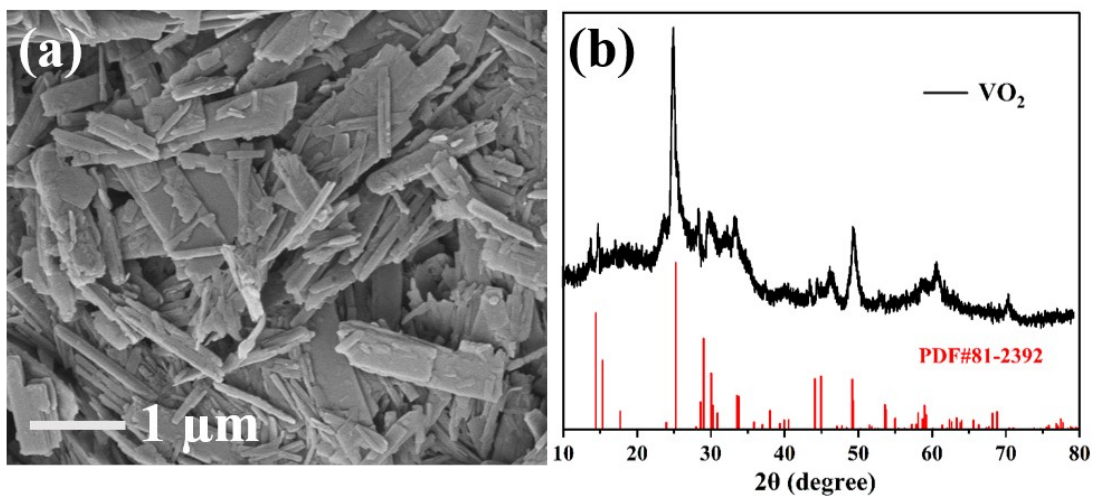

Fig. S16 (a) XRD pattern of VO<sub>2</sub>; (b) SEM image of VO<sub>2</sub>.

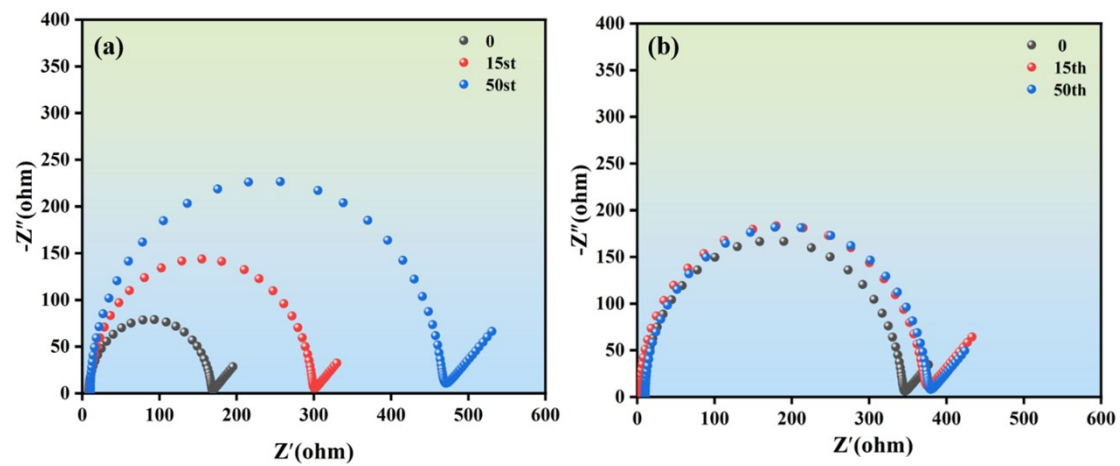

Fig. S17 (a) EIS of different cycles without Cy additive (b) EIS of different cycles with Cy additive

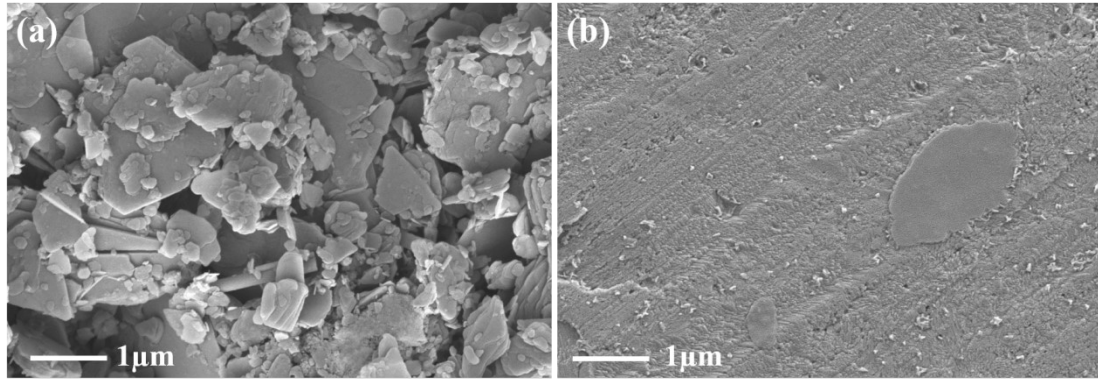

Fig S18 SEM images of Zn electrodes for Zn//VO<sub>2</sub> full cells cycled for 100 cycles in (a) ZS electrolytes and (b) 10 g/L Cy-added ZS electrolytes.



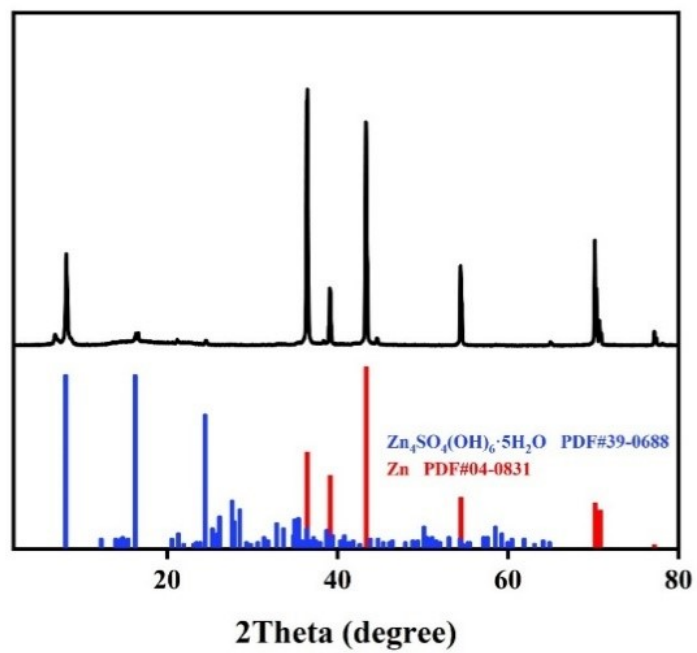

Fig. S19 XRD of Zn after 100 cycles

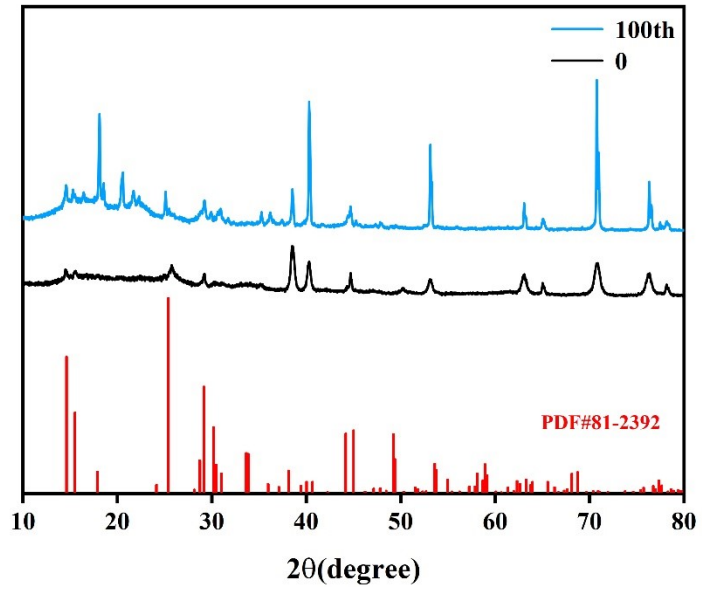

Fig. 20 XRD of VO<sub>2</sub> after uncyclic and circulating 100 cycles

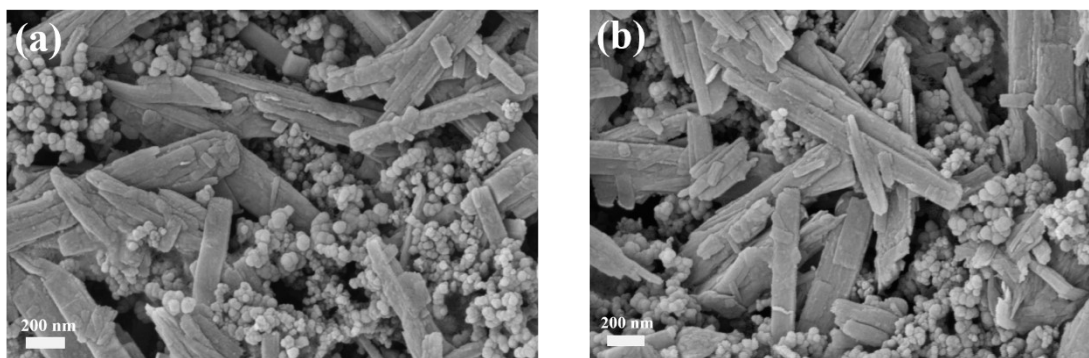

Fig. 21 (a) SEM of original  $\text{VO}_2$  (b) SEM of  $\text{VO}_2$  after 100 cycles

**Table S1.** Comparison of the electrochemical properties of recently reported Zn||Zn symmetric cells in Zn-ion batteries with the present work.

| Modified materials                                 | Current density with capacity                        | Cycle life | Ref.             |
|----------------------------------------------------|------------------------------------------------------|------------|------------------|
| Cy                                                 | 2mA cm <sup>-2</sup> with 1mAh cm <sup>-2</sup>      | 4000h      | <b>This work</b> |
| DG                                                 | 1mA cm <sup>-2</sup> with 0.5mAh cm <sup>-2</sup>    | 3500h      | [17]             |
| DMSO                                               | 0.5mA cm <sup>-2</sup> with 0.5mAh cm <sup>-2</sup>  | 1000h      | [18]             |
| PG                                                 | 0.5mA cm <sup>-2</sup> with 0.5mAh cm <sup>-2</sup>  | 3500h      | [19]             |
| Azi                                                | 1mA cm <sup>-2</sup> with 1mAh cm <sup>-2</sup>      | 4000h      | [20]             |
| Coumarin                                           | 5mA cm <sup>-2</sup> with 5mAh cm <sup>-2</sup>      | 400h       | [21]             |
| ggg                                                | 2mA cm <sup>-2</sup> with 2mAh cm <sup>-2</sup>      | 1400h      | [22]             |
| Ace                                                | 1mA cm <sup>-2</sup> with 1mAh cm <sup>-2</sup>      | 3000h      | [23]             |
| TBP                                                | 2mA cm <sup>-2</sup> with 1mAh cm <sup>-2</sup>      | 2100h      | [24]             |
| DTPA-Na                                            | 2mA cm <sup>-2</sup> with 1mAh cm <sup>-2</sup>      | 800h       | [25]             |
| CTAB                                               | 2mA cm <sup>-2</sup> with 1mAh cm <sup>-2</sup>      | 2000h      | [26]             |
| TPPS                                               | 1mA cm <sup>-2</sup> with 1mAh cm <sup>-2</sup>      | 2300h      | [27]             |
| ZnBF-VC                                            | 0.5mA cm <sup>-2</sup> with 0.25mAh cm <sup>-2</sup> | 2200h      | [28]             |
| Me56                                               | 5mA cm <sup>-2</sup> with 5mAh cm <sup>-2</sup>      | 1000h      | [29]             |
| ZS/C <sub>3</sub> N <sup>+</sup> -COO <sup>-</sup> | 1mA cm <sup>-2</sup> with 1mAh cm <sup>-2</sup>      | 3500h      | [30]             |
| DDM                                                | 0.5mA cm <sup>-2</sup> with 0.5mAh cm <sup>-2</sup>  | 1400h      | [31]             |

## References

- [1] S. Plimpton, Fast Parallel Algorithms for Short-Range Molecular Dynamics, *J. Comput. Phys* 117 (1995) 1-19.
- [2] A.P. Thompson, H.M. Aktulga, R. Berger, D.S. Bolintineanu, W.M. Brown, P.S. Crozier, P.J. in 't Veld, A. Kohlmeyer, S.G. Moore, T.D. Nguyen, R. Shan, M.J. Stevens, J. Tranchida, C. Trott, S.J. Plimpton, LAMMPS - a flexible simulation tool for particle-based materials modeling at the atomic, meso, and continuum scales, *Computer Physics Communications* 271 (2022). <https://doi.org/10.1016/j.cpc.2021.108171>.
- [3] L. Martinez, Andrade,R., Birgin,E.G.&Martinez,J, PACKMOL:a package for building initial configurations for molecular dynamics simulations, *J. Comput. Chem* 30 (2009) 2157-2164.
- [4] M.R.-H. A. Menke, T. Klengel, E.B. Binder, D. Mehta, Peripheral blood gene expression: it all boils down to the RNA collection tubes, *BMC Res. Notes* 5 (2012) 1.
- [5] W. Humphrey, Dalke, A. & Schulten, K., VMD: visual molecular dynamics, *J. Mol. Graph* 14 (1996) 27-38.
- [6] T. Lu, F. Chen, Multiwfn: A multifunctional wavefunction analyzer, *Journal of Computational Chemistry* 33(5) (2012) 580-592. <https://doi.org/10.1002/jcc.22885>.
- [7] J. Zhang, T. Lu, Efficient evaluation of electrostatic potential with computerized optimized code, *Physical Chemistry Chemical Physics* 23(36) (2021) 20323-20328. <https://doi.org/10.1039/d1cp02805g>.
- [8] F.J.D. P.J. Stephens, C.F. Chabalowski, M.J. Frisch, Ab initio calculation of vibrational absorption and circular dichroism spectra using density functional force fields, *J. Phys.Chem* 98(45) (1994) 11623-11627.
- [9] F. Weigend, R. Ahlrichs, Balanced basis sets of split valence, triple zeta valence and quadruple zeta valence quality for H to Rn: Design and assessment of accuracy, *Physical Chemistry Chemical Physics* 7(18) (2005). <https://doi.org/10.1039/b508541a>.
- [10] C.J.C. A.V. Marenich, D.G. Truhlar, Universal solvation model based on solute electron density and on a continuum model of the solvent defined by the bulk dielectric constant and atomic surface tensions., *J. Phys. Chem. B* 113(18) (2009) 6378-6396.
- [11] G. Kresse, J. Hafner, Ab initiomolecular-dynamics simulation of the liquid-metal–amorphous-semiconductor transition in germanium, *Physical Review B* 49(20) (1994) 14251-14269. <https://doi.org/10.1103/PhysRevB.49.14251>.
- [12] G. Kresse, Joubert, D, From Ultrasoft Pseudopotentials to the Projector Augmented–Wave Method., *Phys. Rev. B* 59 (1999) 1758-1775.
- [13] G. Kresse, Furthmüller, J, Efficient Iterative Schemes for Ab Initio Total-Energy Calculations Using a Plane-Wave Basis Set, *Phys. Rev. B* 54 (1996) 11169-11186.
- [14] J.P. Perdew, Burke, K., Ernzerhof, M, Generalized Gradient Approximation Made Simple, *Phys. Rev. Lett* 77 (1996) 3865-3868.
- [15] S. Grimme, S. Ehrlich, L. Goerigk, Effect of the damping function in dispersion corrected density functional theory, *Journal of Computational Chemistry* 32(7) (2011) 1456-1465. <https://doi.org/10.1002/jcc.21759>.
- [16] H.J. Monkhorst, J.D. Pack, Special points for Brillouin-zone integrations, *Physical Review B* 13(12) (1976) 5188-5192. <https://doi.org/10.1103/PhysRevB.13.5188>.
- [17] W. Fan, P. Li, J. Shi, J. Chen, W. Tian, H. Wang, J. Wu, G. Yu, Atomic Zincophilic Sites Regulating Microspace Electric Fields for Dendrite-Free Zinc Anode, *Advanced Materials* 36(1) (2023).

<https://doi.org/10.1002/adma.202307219>.

- [18] L. Cao, D. Li, E. Hu, J. Xu, T. Deng, L. Ma, Y. Wang, X.Q. Yang, C. Wang, Solvation Structure Design for Aqueous Zn Metal Batteries, *J Am Chem Soc* 142(51) (2020) 21404-21409. <https://doi.org/10.1021/jacs.0c09794>.
- [19] Z. Shi, M. Yang, Y. Ren, Y. Wang, J. Guo, J. Yin, F. Lai, W. Zhang, S. Chen, H.N. Alshareef, T. Liu, Highly Reversible Zn Anodes Achieved by Enhancing Ion-Transport Kinetics and Modulating Zn (002) Deposition, *ACS Nano* 17(21) (2023) 21893-21904. <https://doi.org/10.1021/acsnano.3c08197>.
- [20] X. Bai, Y. Nan, K. Yang, B. Deng, J. Shao, W. Hu, X. Pu, Zn Ionophores to Suppress Hydrogen Evolution and Promote Uniform Zn Deposition in Aqueous Zn Batteries, *Advanced Functional Materials* 33(42) (2023) 2307595. <https://doi.org/10.1002/adfm.202307595>.
- [21] Z. Li, Z. Shu, Z. Shen, Y. Liu, Y. Ji, L. Luo, R. Li, Y. Cai, H. Ian, J. Xie, G. Hong, Dissolution Mechanism for Dendrite-Free Aqueous Zinc-Ions Batteries, *Advanced Energy Materials* (2024) 2400572. <https://doi.org/10.1002/aenm.202400572>.
- [22] J. Zhang, Y. Liu, Y. Wang, Z. Zhu, Z. Yang, Zwitterionic Organic Multifunctional Additive Stabilizes Electrodes for Reversible Aqueous Zn-Ion Batteries, *Advanced Functional Materials* (2024) 2401889. <https://doi.org/10.1002/adfm.202401889>.
- [23] K. Qiu, G. Ma, Y. Wang, M. Liu, M. Zhang, X. Li, X. Qu, W. Yuan, X. Nie, N. Zhang, Highly Compact Zinc Metal Anode and Wide-Temperature Aqueous Electrolyte Enabled by Acetamide Additives for Deep Cycling Zn Batteries, *Advanced Functional Materials* (2024) 2313358. <https://doi.org/10.1002/adfm.202313358>.
- [24] S. Yang, A. Chen, Z. Tang, Z. Wu, P. Li, Y. Wang, X. Wang, X. Jin, S. Bai, C. Zhi, Regulating the electrochemical reduction kinetics by the steric hindrance effect for a robust Zn metal anode, *Energy & Environmental Science* 17(3) (2024) 1095-1106. <https://doi.org/10.1039/d3ee02164e>.
- [25] Y. Xia, R. Tong, J. Zhang, M. Xu, G. Shao, H. Wang, Y. Dong, C.-A. Wang, Polarizable Additive with Intermediate Chelation Strength for Stable Aqueous Zinc-Ion Batteries, *Nano-Micro Letters* 16(1) (2024) 82. <https://doi.org/10.1007/s40820-023-01305-0>.
- [26] Z. Liu, R. Wang, Y. Gao, S. Zhang, J. Wan, J. Mao, L. Zhang, H. Li, J. Hao, G. Li, L. Zhang, C. Zhang, Low-Cost Multi-Function Electrolyte Additive Enabling Highly Stable Interfacial Chemical Environment for Highly Reversible Aqueous Zinc Ion Batteries, *Advanced Functional Materials* 33(49) (2023) 2308463. <https://doi.org/10.1002/adfm.202308463>.
- [27] X. Zhao, Y. Wang, C. Huang, Y. Gao, M. Huang, Y. Ding, X. Wang, Z. Si, D. Zhou, F. Kang, Tetraphenylporphyrin-based Chelating Ligand Additive as a Molecular Sieving Interfacial Barrier toward Durable Aqueous Zinc Metal Batteries, *Angewandte Chemie International Edition* 62(46) (2023) e202312193. <https://doi.org/10.1002/anie.202312193>.
- [28] S. Wang, Y. Ying, S. Chen, H. Wang, K.K.K. Cheung, C. Peng, H. Huang, L. Ma, J.A. Zapien, Highly reversible zinc metal anode enabled by zinc fluoroborate salt-based hydrous organic electrolyte, *Energy Storage Materials* 63 (2023) 102971. <https://doi.org/10.1016/j.ensm.2023.102971>.
- [29] X. Wang, K. Feng, B. Sang, G. Li, Z. Zhang, G. Zhou, B. Xi, X. An, S. Xiong, Highly Reversible Zinc Metal Anodes Enabled by Solvation Structure and Interface Chemistry Modulation, *Advanced Energy Materials* 13(36) (2023) 2301670. <https://doi.org/10.1002/aenm.202301670>.
- [30] X. Wu, Y. Xia, S. Chen, Z. Luo, X. Zhang, Y. Lu, H. Pan, B.B. Xu, M. Yan, Y. Jiang, Transient Zwitterions Dynamics Empowered Adaptive Interface for Ultra-Stable Zn Plating/Stripping, *Small* 20(8) (2023) 2306739. <https://doi.org/10.1002/smll.202306739>.
- [31] K. Xiao, L. Yang, M. Peng, X. Jiang, T. Hu, K. Yuan, Y. Chen, Unlocking the Effect of Chain

Length and Terminal Group on Ethylene Glycol Ether Family Toward Advanced Aqueous Electrolytes,  
Small 20(12) (2023) 2306808. <https://doi.org/10.1002/sml.202306808>.
